# Supplementary material
Source: PubMed Central journal article supplement (PMC7964530)
Supplement: 3787_appendix.pdf [file 3787_appendix.pdf]

## ON-LINE APPENDIX

### Search Strategy Key Terms Used in EMBASE

1. exp aneurysm/
2. aneurysm\$.mp.
3. 1 or 2
4. sah.mp.
5. subarachnoid hemorrhage/
6. ((arachnoid\$ or subarachnoid\$) adj5 (bleeding or blood or hemorrhag\$ or haemorrhag\$)).mp.
7. 4 or 5 or 6
8. exp tomography, x-ray computed/
9. expscintigraphy/
10. 8 and 9
11. ((ct or scan or scanner or scanning or scanned or scintigraphy or tomography or imaging or image\$) adj5 perfus\$).mp.
12. 10 or 11
13. 3 and 7 and 12
14. limit 13 to (EMBASE and "reviews (maximizes sensitivity)")

### Search Strategy Key Terms Used in Ovid MEDLINE

1. exp Aneurysm/
2. aneurysm\$.mp.
3. 1 or 2
4. exp Subarachnoid Hemorrhage/
5. ((arachnoid\$ or subarachnoid\$) adj5 (bleeding or blood or hemorrhag\$ or haemorrhag\$)).mp.
6. sah.mp.
7. 4 or 5 or 6
8. exp Perfusion Imaging/
9. exp tomography, x-ray computed/
10. 8 and 9
11. ((ct or scan or scanner or scanning or scanned or scintigraphy or tomography or imaging or image\$) adj5 perfus\$).mp.
12. 10 or 11
13. 3 and 7 and 12
14. limit 13 to "prognosis (maximizes sensitivity)"

### Search Strategy Key Terms Used in Web of Science

1. Topic = (aneurysm\*)
2. Topic = (blood OR bleeding OR hemorrhage\* OR hemorrhag\*)
3. Topic = (arachnoid\* OR subarachnoid\*)
4. Topic = (tomography OR ct OR scan OR scanning OR scanned OR scans OR imagery OR imaging)
5. Topic = (tomography OR ct OR scan OR scan OR scanning OR scanned OR scans OR imagery OR imaging) AND Topic = (perfus\*)
6. Topic = (perfus\*)
7. #3 and #1
8. #3 and #2
9. #8 OR #7
10. #6 AND #4
11. #10 OR #5
12. #11 AND #10 AND #9
13. Topic = (prognostic OR prognosis OR outcome\* OR incident OR incidence OR predict\* OR course\*)

14. #13 AND #12
15. Title = (aneurysm\*)
16. Title = (arachnoid OR subarachnoid\*)
17. Title = (tomography OR ct OR scan OR scanning OR scanned OR scans OR imagery OR imaging)
18. Title = (blood OR bleeding OR hemorrhage\* or hemorrhag\*)
19. #18 OR #17 OR #16 OR #15
20. #19 AND #14

### QUADAS Tool Used to Assess Studies<sup>11</sup>

1. Was the spectrum of patients representative of the patients who will receive the test in practice? (Assessment of spectrum bias)
2. Were selection criteria clearly described?
3. Is the reference standard likely to correctly classify the target condition?
4. Is the period between the reference standard and index test short enough to be reasonably sure that the target condition did not change between the 2 tests? (Assessment of disease progression bias)
5. Did the entire sample, or a random selection of the sample, receive verification by using the reference standard of diagnosis? (Assessment of primary selection bias)
6. Did patients receive the same reference standard regardless of the index test result? (Assessment of differential verification bias)
7. Was the reference standard independent of the index test (ie, the test did not form part of the reference standard)? (Assessment of incorporation bias)
8. Was the execution of the index test described in sufficient detail to permit replication of the test?
9. Was the execution of the reference standard described in sufficient detail to allow its replication?
10. Were the index test results interpreted without knowledge of the results of the reference standard?
11. Were the reference standard results interpreted without knowledge of the results of the index test?
12. Were the same clinical data available when test results were interpreted as would be available when the test is used in practice?
13. Were uninterpretable/intermediate test results reported?
14. Were withdrawals from the study explained?

**On-line Table 1: Study characteristics: Baseline demographic data and disease characteristics of studies included in the systematic review**

| Study First Author and Year             | Study Design | No. of Patients Analyzed | No. of Patients with DCI | No. of Patients without DCI | Mean Age (SD)                                      | Male (%) | Admission Disease Severity (DCI Group) | Admission Disease Severity (Non-DCI Group) | No. (Percentage) Coiled (DCI) | No. (Percentage) Coiled (Non-DCI) | No. (Percentage) Clipped (DCI) | No. (Percentage) Clipped (non-DCI) | If DCI, Median Day of Clinical Deterioration |
|-----------------------------------------|--------------|--------------------------|--------------------------|-----------------------------|----------------------------------------------------|----------|----------------------------------------|--------------------------------------------|-------------------------------|-----------------------------------|--------------------------------|------------------------------------|----------------------------------------------|
| Harrigan et al, 2005 <sup>23</sup>      | Prospective  | 10                       | 7                        | 3                           | 52.5                                               | 30%      | Good (HH, 2.22)                        | Good (HH, 2.33)                            | 5 (71%)                       | 3 (100%)                          | 1 (14.3%)                      | 0 (0%)                             | 5                                            |
| Sviri et al, 2006 <sup>24</sup>         | Prospective  | 46                       | 24                       | 22                          | 50.2                                               | 41%      | Good (HH, 2.8)                         | Good (HH, 2.8)                             | 14 (60%)                      | 14 (60%)                          | 32 (69%)                       | 36 (52% all)                       | N/A                                          |
| van der Schaaf et al, 2006 <sup>2</sup> | Prospective  | 69                       | 20                       | 49                          | 54.9                                               | 22%      | Good (WFNS, 2.27)                      | Good (WFNS, 2.27)                          | 24 (50%)                      | 24 (50%)                          | 36 (52% all)                   | 36 (52% all)                       | N/A                                          |
| Pham et al, 2007 <sup>25</sup>          | Prospective  | 38                       | 14                       | 24                          | 50.4                                               | Unknown  | Good (HH, 2.36)                        | Good (HH, 2.36)                            | Unknown                       | Unknown                           | Unknown                        | Unknown                            | 6                                            |
| Dankbaar et al, 2010 <sup>13</sup>      | Prospective  | 85                       | 50                       | 35                          | 55.82 (weighted average of median DCI and non-DCI) | 28.00%   | Good (WFNS, 2.66)                      | Good (WFNS, 1.62)                          | 27 (54%)                      | 14 (40%)                          | 23 (46%)                       | 20 (57%)                           | 6                                            |
| Sanelli et al, 2011 <sup>14</sup>       | Prospective  | 97                       | 40                       | 57                          | 49                                                 | 27%      | Poor (HH, 3.125)                       | Good (HH, 2.42)                            | 20 (50%)                      | 24 (42%)                          | 20 (50%)                       | 33 (58%)                           | 7                                            |

**Note:**—HH indicates Hunt and Hess; NA, not available; SD, standard deviation; WFNS, World Federation of Neurosurgical Societies.

**On-line Table 2: Summary of CTP technique and DCI outcome definition used in each study**

| Study First Author and Year             | Time during CTP Performance (before Symptoms, during Symptoms or Both) | CTP Data Analyzed Quantitatively, Qualitatively, or Both? | CTP Postprocessing Software Vendor? | CTP Postprocessing Algorithm? | CTP Postprocessing CTP Test Result or Best Parameter       | Definition of Abnormal CTP Test Result or Best Parameter | Definition of DCI                                                                                                                                                                                                 | Did the Study Measure "Clinical Deterioration" as an Outcome? | Did the Study Measure CT or MRI Infarction as a DCI Outcome? | Did the Study Measure Functional Disability as an Outcome? |
|-----------------------------------------|------------------------------------------------------------------------|-----------------------------------------------------------|-------------------------------------|-------------------------------|------------------------------------------------------------|----------------------------------------------------------|-------------------------------------------------------------------------------------------------------------------------------------------------------------------------------------------------------------------|---------------------------------------------------------------|--------------------------------------------------------------|------------------------------------------------------------|
| Harrigan et al, 2005 <sup>23</sup>      | Symptoms                                                               | Both                                                      | Siemens                             | Maximum slope model           | Based on clinical/CTP results and decision made by authors | Maximum slope                                            | Symptomatic deterioration not explained by other causes.                                                                                                                                                          | Y                                                             | N                                                            | N                                                          |
| Sviri et al, 2006 <sup>24</sup>         | Unknown                                                                | Quantitatively                                            | GE Healthcare                       | Deconvolution                 | MTT > 6.5 s                                                | Deconvolution                                            | GCS ↓ by 2 points for ≥30 minutes with altered level of consciousness and new hemiplegia or hemiparesis, or ↓ 2 points in the muscle scale in previously hemiparetic patients after other possibilities excluded. | Y                                                             | N                                                            | N                                                          |
| van der Schaaf et al, 2006 <sup>2</sup> | Unknown                                                                | Quantitatively                                            | Philips                             | Deconvolution                 | Unknown                                                    | Deconvolution                                            | Probable DCI (↓ 1 point on GCS without other explanations), definite DCI (probable DCI + infarction)                                                                                                              | Y                                                             | Y                                                            | N                                                          |
| Pham et al, 2007 <sup>25</sup>          | Both                                                                   | Both                                                      | Siemens                             | Maximum slope model           | Prolonged TTP                                              | Deconvolution                                            | Secondary cerebral infarction                                                                                                                                                                                     | N                                                             | Y                                                            | N                                                          |
| Dankbaar et al, 2010 <sup>13</sup>      | Symptoms                                                               | Quantitatively                                            | Philips                             | Deconvolution                 | N/A                                                        | Deconvolution                                            | Retrospectively, after exclusion of other causes                                                                                                                                                                  | Y                                                             | N                                                            | N                                                          |
| Sanelli et al, 2011 <sup>14</sup>       | Both                                                                   | Both                                                      | GE Healthcare                       | Deconvolution                 | Focal deficits with prolonged MTT or decreased CBF         | Deconvolution                                            | Multistage reference standard <sup>28,29</sup>                                                                                                                                                                    | Y                                                             | Y                                                            | Y                                                          |

**Note:**—GE indicates General Electric; GCS, Glasgow Coma Scale.
